# Supplementary material for: Effect of Wnt5a on drug resistance in estrogen receptor-positive breast cancer
Source: PubMed Central journal article supplement (PMC8354951; doi:10.1007/s12282-021-01241-0), 2021-05-28
Supplement: 12282_2021_1241_MOESM1_ESM.pdf [file 12282_2021_1241_MOESM1_ESM.pdf]

## **Effect of Wnt5a on drug resistance in estrogen receptor-positive breast cancer**

Ai Amioka<sup>1)</sup>, Takayuki Kadoya<sup>1)</sup>, Satoshi Sueoka<sup>1)</sup>, Yoshie Kobayashi<sup>1)</sup>, Shinsuke Sasada<sup>1)</sup>, Akiko Emi<sup>1)</sup>, Norio Masumoto<sup>1)</sup>, Masaoki Ito<sup>1)</sup>, Koh Nakayama<sup>2)</sup>, Morihito Okada<sup>1)</sup>

1) Department of Surgical Oncology, Research Institute for Radiation Biology and

Medicine, Hiroshima University, 1-2-3 Kasumi, Minami-Ku, Hiroshima 734-8551,

Japan

2) Oxygen Biology Laboratory, Medical Research Institute, Tokyo Medical and Dental

University, Bunkyo-ku, Tokyo 113-8510, Japan

### **Corresponding author:**

Takayuki Kadoya, M.D, Ph.D

**Email:** [takayukikadoya@gmail.com](mailto:takayukikadoya@gmail.com)

**Tel.:** +81-082-257-5869

**Fax:** +81-082-256-7109

## Online Resource 1

### A. The materials used in the cell viability assay

| Materials                  | Manufacturing company                                  | catalog number |
|----------------------------|--------------------------------------------------------|----------------|
| (Z)-4-hydroxytamoxifen     | Sigma-Aldrich (St. Louis, MO, USA)                     | H7904          |
| Epirubicin (hydrochloride) | Cayman Chemical (Ann Arbor, MI, USA)                   | 1640184        |
| Paclitaxel                 | FUJIFILM Wako Pure Chemical Corporation (Osaka, Japan) | 33069-62-4     |
| Cyclophosphamide           | FUJIFILM Wako Pure Chemical Corporation (Osaka, Japan) | 030-12953      |
| 5-fluorouracil             | FUJIFILM Wako Pure Chemical Corporation (Osaka, Japan) | 068-01401      |

### B. List of antibodies used in western blot analysis

---

| Antibody                                             | Manufacturing company                        | catalog number |
|------------------------------------------------------|----------------------------------------------|----------------|
| Anti-Wnt5a/b rabbit monoclonal antibody              | Cell Signaling Technology (Beverly, MA, USA) | 2530           |
| Anti-phospho-AKT (Ser473) antibody                   | Cell Signaling Technology (Beverly, MA, USA) | 9271           |
| Anti-phospho-AKT (Thr308) rabbit monoclonal antibody | Cell Signaling Technology (Beverly, MA, USA) | 4056           |
| Anti-phospho-SAPK/JNK (Tyr185) antibody              | Cell Signaling Technology (Beverly, MA, USA) | 9251           |
| Anti-ER antibody                                     | Abcam (Cambridge, UK)                        | ab16660        |
| Anti-HER2 antibody                                   | Abcam (Cambridge, UK)                        | ab214275       |
| Anti- $\beta$ -actin antibody                        | Sigma-Aldrich (St Louis, MO, USA)            | A5441          |

---

### C. The nucleotide sequences of the primers used in this study

---

| Primer            | Nucleotide sequence                                                                        |
|-------------------|--------------------------------------------------------------------------------------------|
| E542K and E545D/K | 5' -GCTAGAGACAATGAATTAAGGGAAAA-3' (forward) and 5' -CTCCATTTTAGCACTTACCTGTGAC-3' (reverse) |
| H1047R/L          | 5' -GCAAGAGGCTTTGGAGTATTT-3' (forward) and 5' -GTGTGGAAGATCCAATCCATTT-3' (reverse)         |
| Wnt5a             | 5' -AAGTTGGTACAGGTCAACAGCCGCT-3' (forward) and 5' -CACATGAGCTCGCAGCCATCCATG-3' (reverse)   |
| $\beta$ -actin.   | 5' -TGAGCGCGGCTACAGCTT-3' (forward) and 5' -TCCTTAATGTCACGCACGATTT-3' (reverse)            |

---
