# Supplementary material for: Effect of Wnt5a on drug resistance in estrogen receptor-positive breast cancer
Source: PubMed Central journal article supplement (PMC8354951; doi:10.1007/s12282-021-01241-0), 2021-05-28
Supplement: 12282_2021_1241_MOESM2_ESM.pdf [file 12282_2021_1241_MOESM2_ESM.pdf]

## **Effect of Wnt5a on drug resistance in estrogen receptor-positive breast cancer**

Ai Amioka<sup>1)</sup>, Takayuki Kadoya<sup>1)</sup>, Satoshi Sueoka<sup>1)</sup>, Yoshie Kobayashi<sup>1)</sup>, Shinsuke Sasada<sup>1)</sup>, Akiko Emi<sup>1)</sup>, Norio Masumoto<sup>1)</sup>, Masaoki Ito<sup>1)</sup>, Koh Nakayama<sup>2)</sup>, Morihito Okada<sup>1)</sup>

1) Department of Surgical Oncology, Research Institute for Radiation Biology and

Medicine, Hiroshima University, 1-2-3 Kasumi, Minami-Ku, Hiroshima 734-8551,

Japan

2) Oxygen Biology Laboratory, Medical Research Institute, Tokyo Medical and Dental

University, Bunkyo-ku, Tokyo 113-8510, Japan

### **Corresponding author:**

Takayuki Kadoya, M.D, Ph.D

**Email:** [takayukikadoya@gmail.com](mailto:takayukikadoya@gmail.com)

**Tel.:** +81-082-257-5869

**Fax:** +81-082-256-7109

## Online Resource 2

### Correlation between the Wnt5a status and the clinical characteristics in ER-positive breast cancer patients

|                              |     | Wnt5a (IHC)   |                   |                   |         |
|------------------------------|-----|---------------|-------------------|-------------------|---------|
|                              |     | Total (n=151) | Negative (n = 83) | Positive (n = 68) | P-value |
| <b>Age at surgery, n (%)</b> |     |               |                   |                   |         |
| Median age at surgery (IQR)  |     | 61.0 (47-69)  | 63.0 (47-69)      | 57.5 (46-68)      | 0.19    |
| <b>Tumor size</b>            |     |               |                   |                   |         |
| pT1                          |     | 103 (68)      | 62 (75)           | 41 (60)           |         |
| pT2/T3                       |     | 48 (32)       | 21 (25)           | 27 (40)           | 0.059   |
| <b>Nodal metastasis</b>      |     |               |                   |                   |         |
| Negative                     |     | 103 (68)      | 72 (87)           | 31 (46)           |         |
| Positive                     |     | 48 (32)       | 11 (13)           | 37 (54)           | <0.001  |
| <b>HER2 status</b>           |     |               |                   |                   |         |
| Negative                     |     | 142 (94)      | 77 (93)           | 65 (96)           |         |
| Positive                     |     | 9 (6.0)       | 6 (7.2)           | 3 (4.4)           | 0.47    |
| <b>Hormonal therapy</b>      |     |               |                   |                   |         |
| Yes                          | TAM | 41 (27)       | 22 (27)           | 19 (28)           |         |

|    |                         |          |         |         |      |
|----|-------------------------|----------|---------|---------|------|
|    | AI                      | 83 (55)  | 46 (55) | 37 (54) |      |
|    | TAM and AI sequentially | 17 (11)  | 9 (11)  | 8 (12)  |      |
| No |                         | 10 (6.6) | 6 (7.2) | 4 (5.9) | 0.74 |

**Adjuvant chemotherapy**

|     |             |          |         |         |       |
|-----|-------------|----------|---------|---------|-------|
| Yes | FEC-DTX/PTX | 13 (8.6) | 2 (2.4) | 11 (16) |       |
|     | FEC         | 2 (1.3)  | 1 (1.2) | 1 (1.5) |       |
|     | TC          | 28 (19)  | 15 (18) | 13 (19) |       |
|     | Other       | 2 (1.3)  | 0 (0)   | 2 (2.9) |       |
| No  |             | 106 (70) | 65 (78) | 41 (60) | 0.016 |

---

Abbreviations: TAM, Tamoxifen; AI, Aromatase inhibitor; FEC, 5-Fluorouracil + Epirubicin + Cyclophosphamide; DTX, Docetaxel; PTX, Paclitaxel; TC, Docetaxel + Cyclophosphamide; IQR, interquartile range; IHC, immunohistochemistry
