# Supplementary material for: Effect of Wnt5a on drug resistance in estrogen receptor-positive breast cancer
Source: PubMed Central journal article supplement (PMC8354951; doi:10.1007/s12282-021-01241-0), 2021-05-28
Supplement: 12282_2021_1241_MOESM3_ESM.pdf [file 12282_2021_1241_MOESM3_ESM.pdf]

## **Effect of Wnt5a on drug resistance in estrogen receptor-positive breast cancer**

Ai Amioka<sup>1)</sup>, Takayuki Kadoya<sup>1)</sup>, Satoshi Sueoka<sup>1)</sup>, Yoshie Kobayashi<sup>1)</sup>, Shinsuke Sasada<sup>1)</sup>, Akiko Emi<sup>1)</sup>, Norio Masumoto<sup>1)</sup>, Masaoki Ito<sup>1)</sup>, Koh Nakayama<sup>2)</sup>, Morihito Okada<sup>1)</sup>

1) Department of Surgical Oncology, Research Institute for Radiation Biology and

Medicine, Hiroshima University, 1-2-3 Kasumi, Minami-Ku, Hiroshima 734-8551,

Japan

2) Oxygen Biology Laboratory, Medical Research Institute, Tokyo Medical and Dental

University, Bunkyo-ku, Tokyo 113-8510, Japan

### **Corresponding author:**

Takayuki Kadoya, M.D, Ph.D

**Email:** [takayukikadoya@gmail.com](mailto:takayukikadoya@gmail.com)

**Tel.:** +81-082-257-5869

**Fax:** +81-082-256-7109

### Online Resource 3

#### Postoperative treatment of recurrent cases of ER-positive breast cancer

| Cases | Wnt5a expression | Adjuvant chemotherapy | Adjuvant hormone therapy |
|-------|------------------|-----------------------|--------------------------|
| 1     | positive         | –                     | TAM                      |
| 2     | positive         | –                     | TAM, LH-RHa              |
| 3     | positive         | –                     | AI                       |
| 4     | positive         | TC                    | AI                       |
| 5     | positive         | FEC+DTX               | –                        |
| 6     | negative         | TC                    | AI                       |

Abbreviations: TAM, Tamoxifen; LH-RHa, Luteinizing hormone-releasing hormone agonist; AI, Aromatase inhibitor; TC, Docetaxel + Cyclophosphamide; FEC, 5-Fluorouracil + Epirubicin + Cyclophosphamide; DTX, Docetaxel.
