# Supplementary material for: Effect of Wnt5a on drug resistance in estrogen receptor-positive breast cancer
Source: PubMed Central journal article supplement (PMC8354951; doi:10.1007/s12282-021-01241-0), 2021-05-28
Supplement: 12282_2021_1241_MOESM5_ESM.pdf [file 12282_2021_1241_MOESM5_ESM.pdf]

## **Effect of Wnt5a on drug resistance in estrogen receptor-positive breast cancer**

Ai Amioka<sup>1)</sup>, Takayuki Kadoya<sup>1)</sup>, Satoshi Sueoka<sup>1)</sup>, Yoshie Kobayashi<sup>1)</sup>, Shinsuke Sasada<sup>1)</sup>, Akiko Emi<sup>1)</sup>, Norio Masumoto<sup>1)</sup>, Masaaki Ito<sup>1)</sup>, Koh Nakayama<sup>2)</sup>, Morihito Okada<sup>1)</sup>

- 1) Department of Surgical Oncology, Research Institute for Radiation Biology and Medicine, Hiroshima University, 1-2-3 Kasumi, Minami-Ku, Hiroshima 734-8551, Japan
- 2) Oxygen Biology Laboratory, Medical Research Institute, Tokyo Medical and Dental University, Bunkyo-ku, Tokyo 113-8510, Japan

### **Corresponding author :**

Takayuki Kadoya, M.D, Ph.D

**Email:** [takayukikadoya@gmail.com](mailto:takayukikadoya@gmail.com)

**Tel.:** +81-082-257-5869

**Fax:** +81-082-256-7109

## Online Resource 5

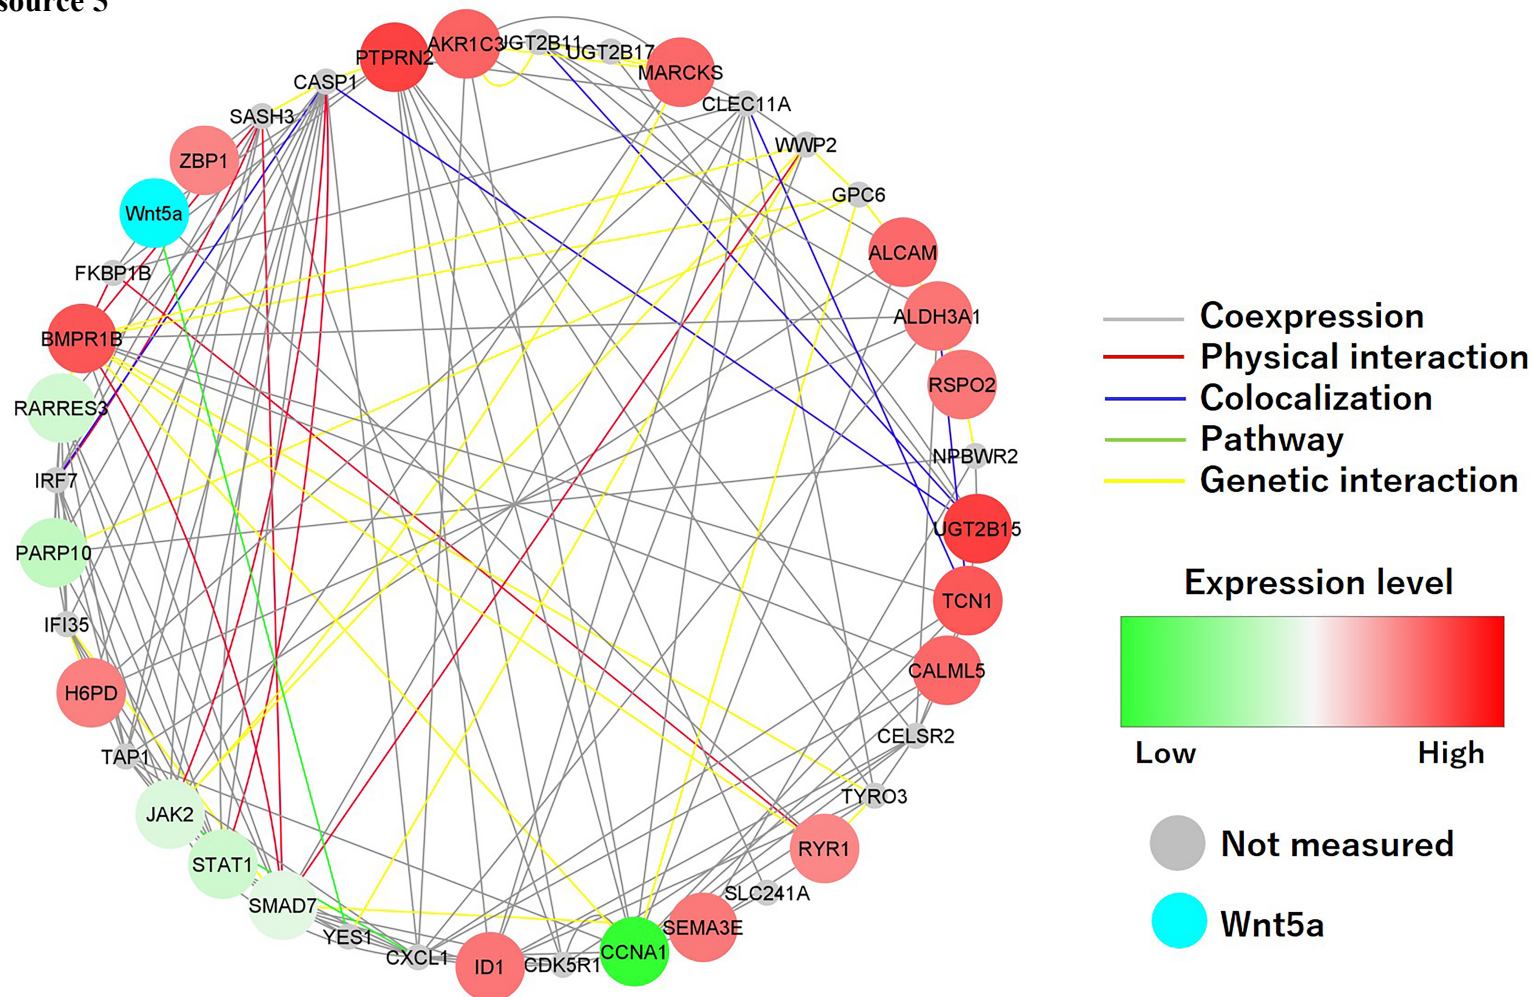

## Interrelationship and expression levels of the genes shown in Online Resource 4

Genes were arranged in a circle and their interrelationships were characterized with colored lines using CytoScope (Version 3.8.2, <http://cytoscape.org>). The gene expression levels after conversion to logarithm are color-coded; from green to red for low or highly expressed genes, respectively. Some genes whose expression was not estimated in DNA microarray analysis are shown as gray circles. The colored lines represent the interrelationships between the connected genes.
