# Supplementary material for: Effect of Wnt5a on drug resistance in estrogen receptor-positive breast cancer
Source: PubMed Central journal article supplement (PMC8354951; doi:10.1007/s12282-021-01241-0), 2021-05-28
Supplement: 12282_2021_1241_MOESM6_ESM.pdf [file 12282_2021_1241_MOESM6_ESM.pdf]

## **Effect of Wnt5a on drug resistance in estrogen receptor-positive breast cancer**

Ai Amioka<sup>1)</sup>, Takayuki Kadoya<sup>1)</sup>, Satoshi Sueoka<sup>1)</sup>, Yoshie Kobayashi<sup>1)</sup>, Shinsuke Sasada<sup>1)</sup>, Akiko Emi<sup>1)</sup>, Norio Masumoto<sup>1)</sup>, Masaoki Ito<sup>1)</sup>, Koh Nakayama<sup>2)</sup>, Morihito Okada<sup>1)</sup>

1) Department of Surgical Oncology, Research Institute for Radiation Biology and

Medicine, Hiroshima University, 1-2-3 Kasumi, Minami-Ku, Hiroshima 734-8551,

Japan

2) Oxygen Biology Laboratory, Medical Research Institute, Tokyo Medical and Dental

University, Bunkyo-ku, Tokyo 113-8510, Japan

### **Corresponding author:**

Takayuki Kadoya, M.D, Ph.D

**Email:** [takayukikadoya@gmail.com](mailto:takayukikadoya@gmail.com)

**Tel.:** +81-082-257-5869

**Fax:** +81-082-256-7109

## Online Resource 6

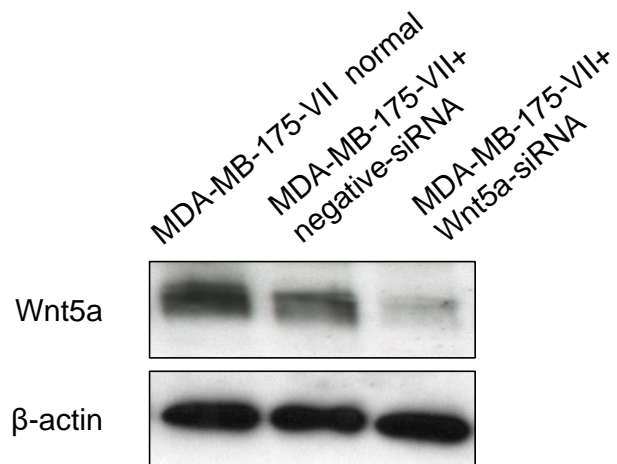

### siRNA transfection of MDA-MB-175-VII cells

MDA-MB-175-VII is a breast cancer cell line ER-positive and HER2-negative, like MCF-7 cells; however, unlike MCF-7 cells, MDA-MB-175-VII cells endogenously express Wnt5a. Twenty-four hours after Wnt5a-siRNA transfection, western blot was performed to confirm that Wnt5a was knocked down.

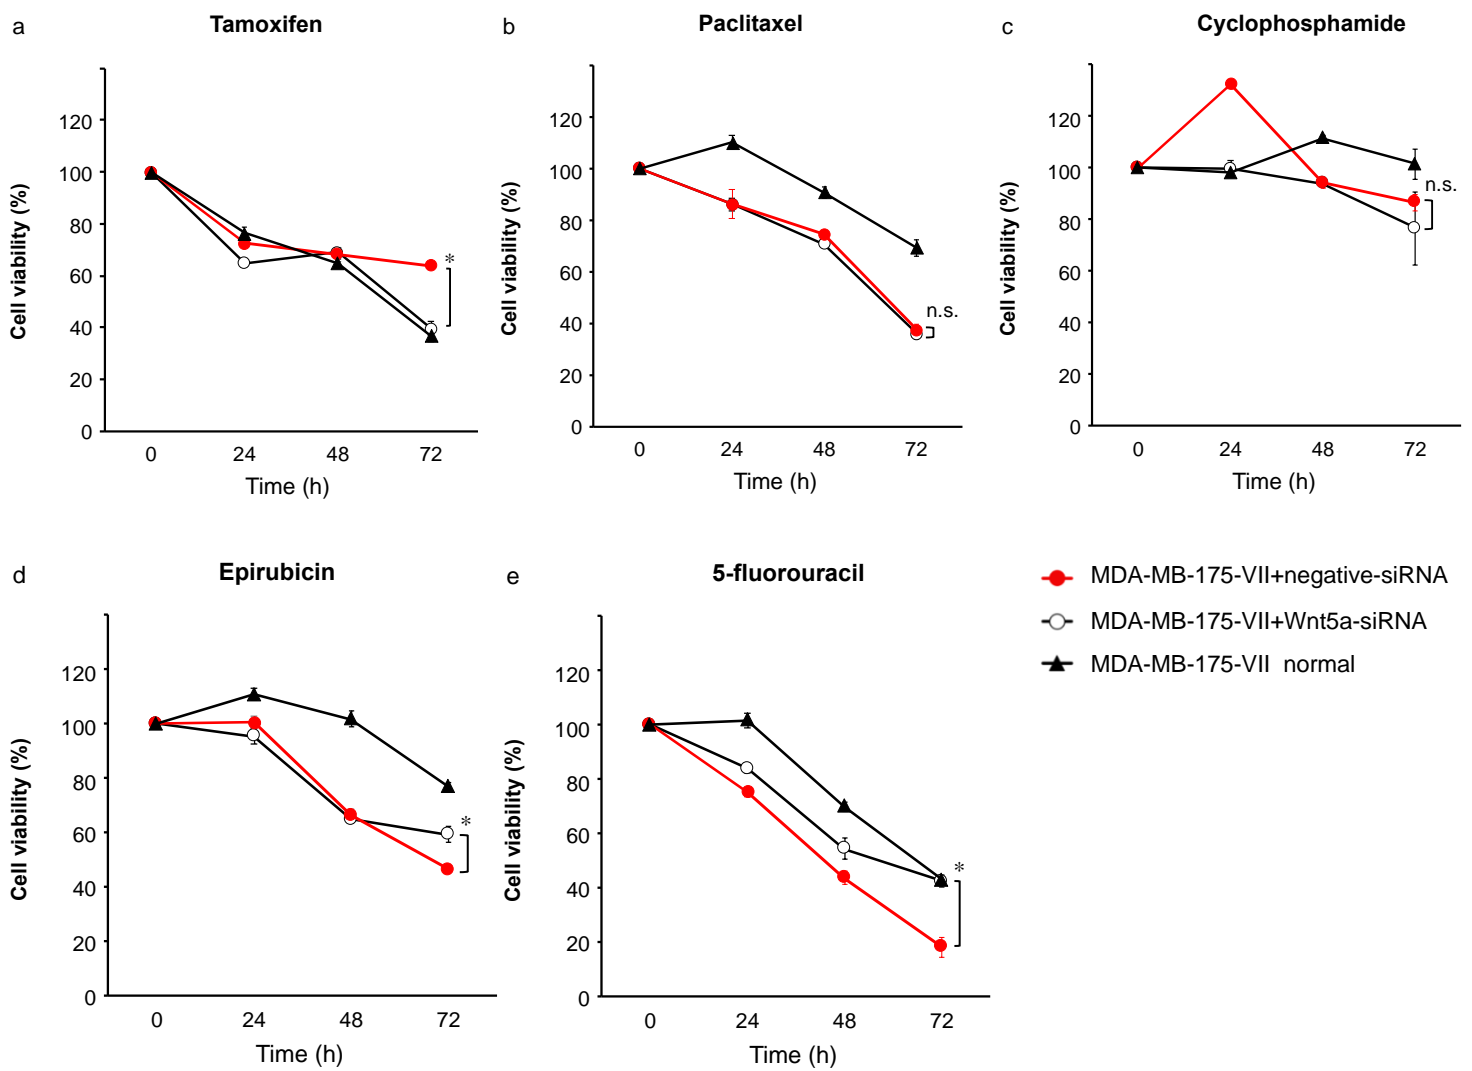

### The expression of Wnt5a diminishes the sensitivity to tamoxifen

MDA-MB-175-VII cells were exposed to 5  $\mu$ M tamoxifen (a), 200 nM paclitaxel (b), 200  $\mu$ M cyclophosphamide (c), 100 nM epirubicin (d), and 400  $\mu$ M 5-fluorouracil (e). Data are represented as the mean  $\pm$  S.D. of 6 measurements. \*  $P < 0.05$ ; n.s., not significant.
